# Supplementary material for: Design of Prussian blue analogue-derived double-cone structure Ce–Fe catalysts and their enhanced performance for the selective catalytic reduction of NOx with NH3
Source: Royal Society of Chemistry journal article supplement (doi:10.1039/d0nj04419a), 2020-01-01
Supplement: d0nj04419a1.pdf [file d0nj04419a1.pdf]

## Supplementary Information

### **Design of Prussian blue analogues derives double-cone structure Ce-Fe catalysts and their enhanced performances for the selective catalytic reduction of NO<sub>x</sub> with NH<sub>3</sub>**

Jie Guo<sup>a,b</sup>, Guodong Zhang<sup>a</sup>, Zhicheng Tang<sup>a,c\*</sup>, Jiyi Zhang<sup>b\*</sup>

*(a. State Key Laboratory for Oxo Synthesis and Selective Oxidation, National Engineering Research Center for Fine Petrochemical Intermediates, Lanzhou Institute of Chemical Physics, Chinese Academy of Sciences, Lanzhou 730000, PR China*

*b. School of petroleum and chemical, Lanzhou University of Technology, Lanzhou 730050, China.*

*c. Dalian National Laboratory for Clean Energy, Dalian Institute of Chemical Physics, Chinese Academy of Sciences, Dalian, 116023, China)*

\*Corresponding author. Tel.: +86-931-4968083, Fax: +86-931-4968019, E-mail address:

tangzhicheng@licp.cas.cn (Z.Tang); [zhangjiyi@lut.cn](mailto:zhangjiyi@lut.cn) (J.Zhang).

### NH<sub>3</sub>-SCR activity measurements

The NH<sub>3</sub>-SCR activity measurement was performed in a fixed bed reactor with 0.40 g catalyst (40-60 mesh), which was carried out under a gas hourly space velocity (GHSV) of 30,000 h<sup>-1</sup>. In addition, the reaction was following simulated gas: 500 ppm NH<sub>3</sub>, 500 ppm NO, 100 ppm SO<sub>2</sub> (when used), 5 vol. % H<sub>2</sub>O (when used), 5 vol. % O<sub>2</sub> and balance N<sub>2</sub>. Meanwhile, the total flow rate was 200 mL min<sup>-1</sup>. Finally, the product gas was analyzed using a flue gas analyzer (KM9106), a N<sub>2</sub>O detector (G200) and an NH<sub>3</sub> detector (DR95C). For the concentration of the gases at steady state, the NO<sub>x</sub> and N<sub>2</sub> selectivity and NH<sub>3</sub> conversion were calculated as follows:

$$\text{NO}_x \text{ Conversion (\%)} = \frac{[\text{NO}_x]_{\text{in}} - [\text{NO}_x]_{\text{out}}}{[\text{NO}_x]_{\text{in}}} \times 100\% \quad (1-1)$$

$$\text{N}_2 \text{ Selectivity(\%)} = \left[ 1 - \frac{2[\text{N}_2\text{O}]_{\text{out}}}{[\text{NO}_x]_{\text{in}} + [\text{NH}_3]_{\text{in}} - [\text{NO}_x]_{\text{out}} - [\text{NH}_3]_{\text{out}}} \right] \times 100\% \quad (1-2)$$

$$\text{NH}_3 \text{ Conversion(\%)} = \frac{[\text{NH}_3]_{\text{in}} - [\text{NH}_3]_{\text{out}}}{[\text{NH}_3]_{\text{in}}} \times 100\% \quad (1-3)$$

Where [NO<sub>x</sub>]<sub>in</sub> and [NH<sub>3</sub>]<sub>in</sub> are the initial concentrations of NO and NH<sub>3</sub>, and [NO<sub>x</sub>]<sub>out</sub>, [N<sub>2</sub>O]<sub>out</sub> and [NH<sub>3</sub>]<sub>out</sub> are the concentrations after reaction at steady state.

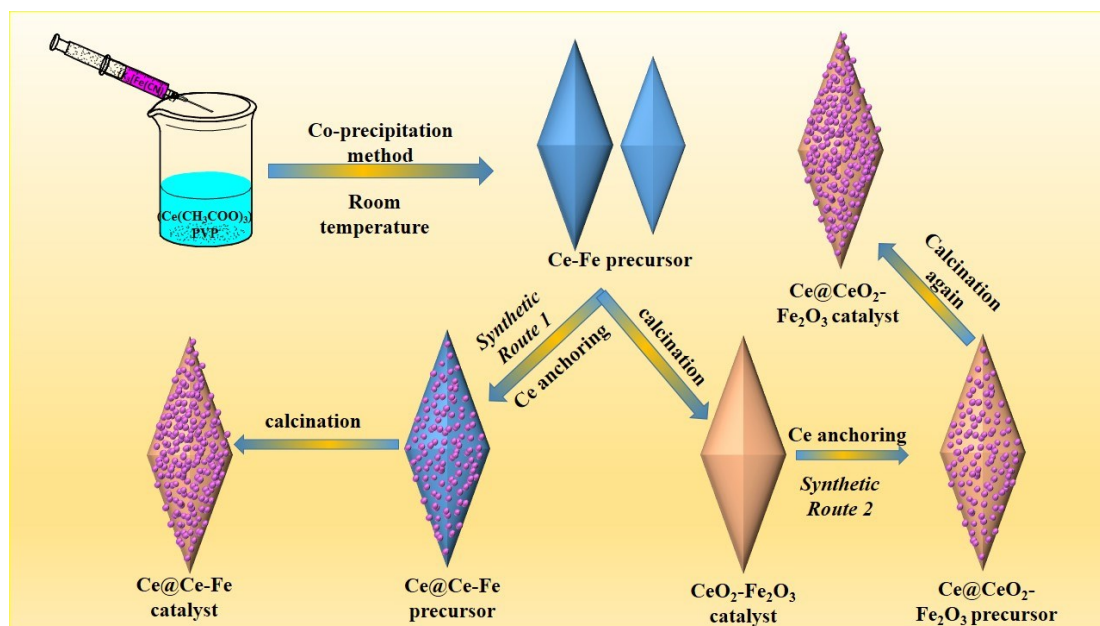

**Scheme S1** Schematic illustration of fabrication of catalysts.

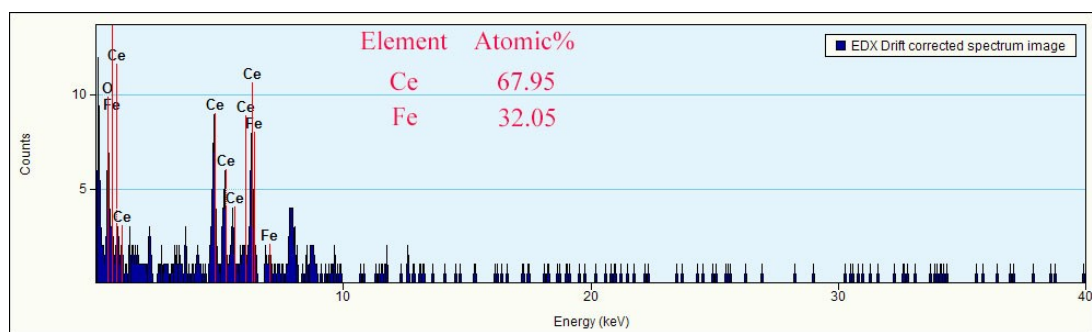

**Figure S1** EDX spectrum of Ce@Ce-Fe catalyst.

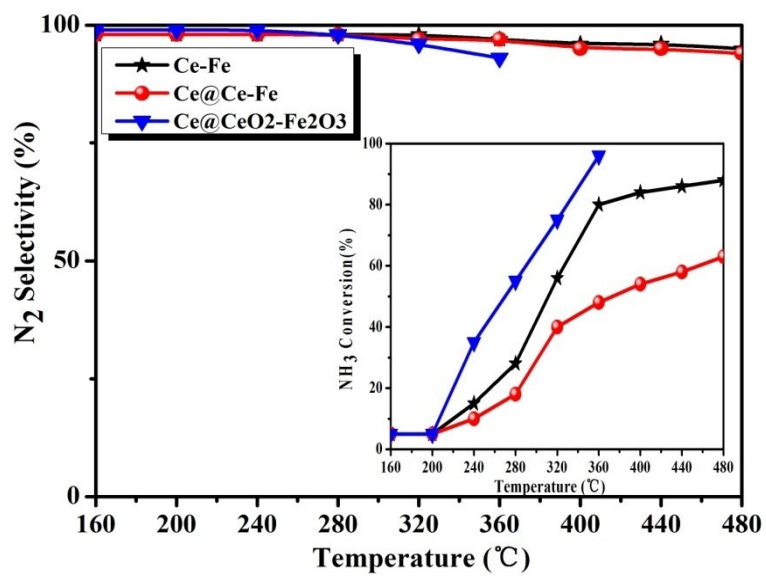

**Figure S2** N<sub>2</sub> selectivity and NH<sub>3</sub> conversion (inner picture) of different catalysts.

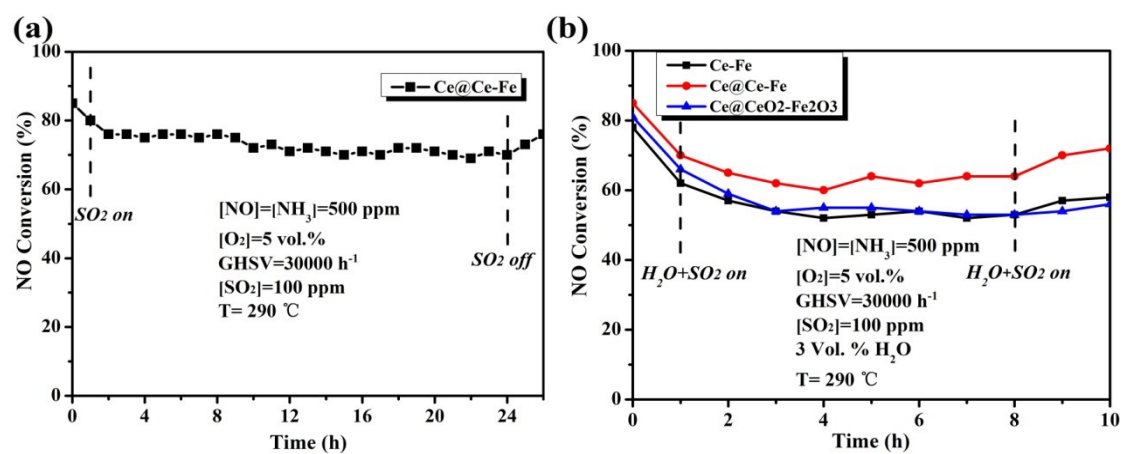

**Figure S3** NO conversion of Ce@Ce-Fe under SO<sub>2</sub> conditions of 24 h (a) and NO conversion under H<sub>2</sub>O and SO<sub>2</sub> conditions of different catalysts (b).

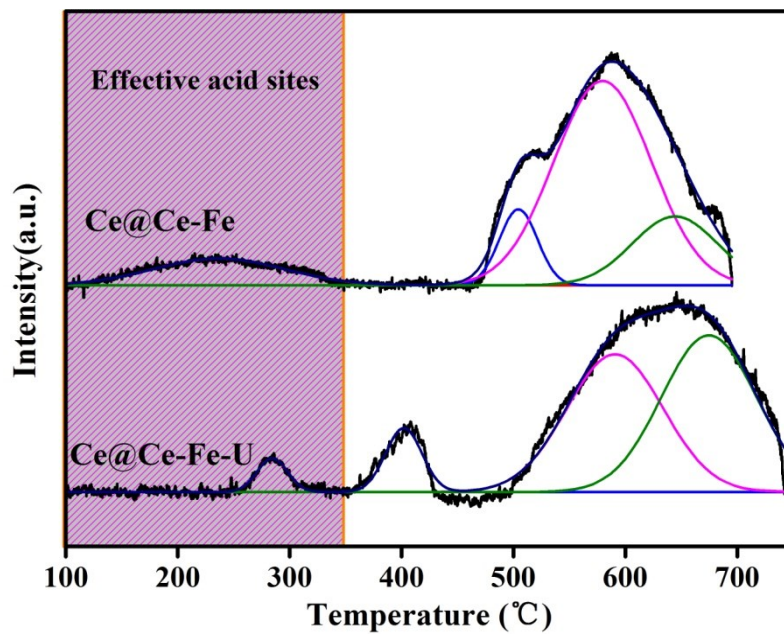

**Figure S4** NH<sub>3</sub>-TPD profiles of Ce@Ce-Fe and Ce@Ce-Fe-U (U represented the used catalyst) catalysts.
